# Supplementary material
Source: PubMed Central journal article supplement (PMC14717)

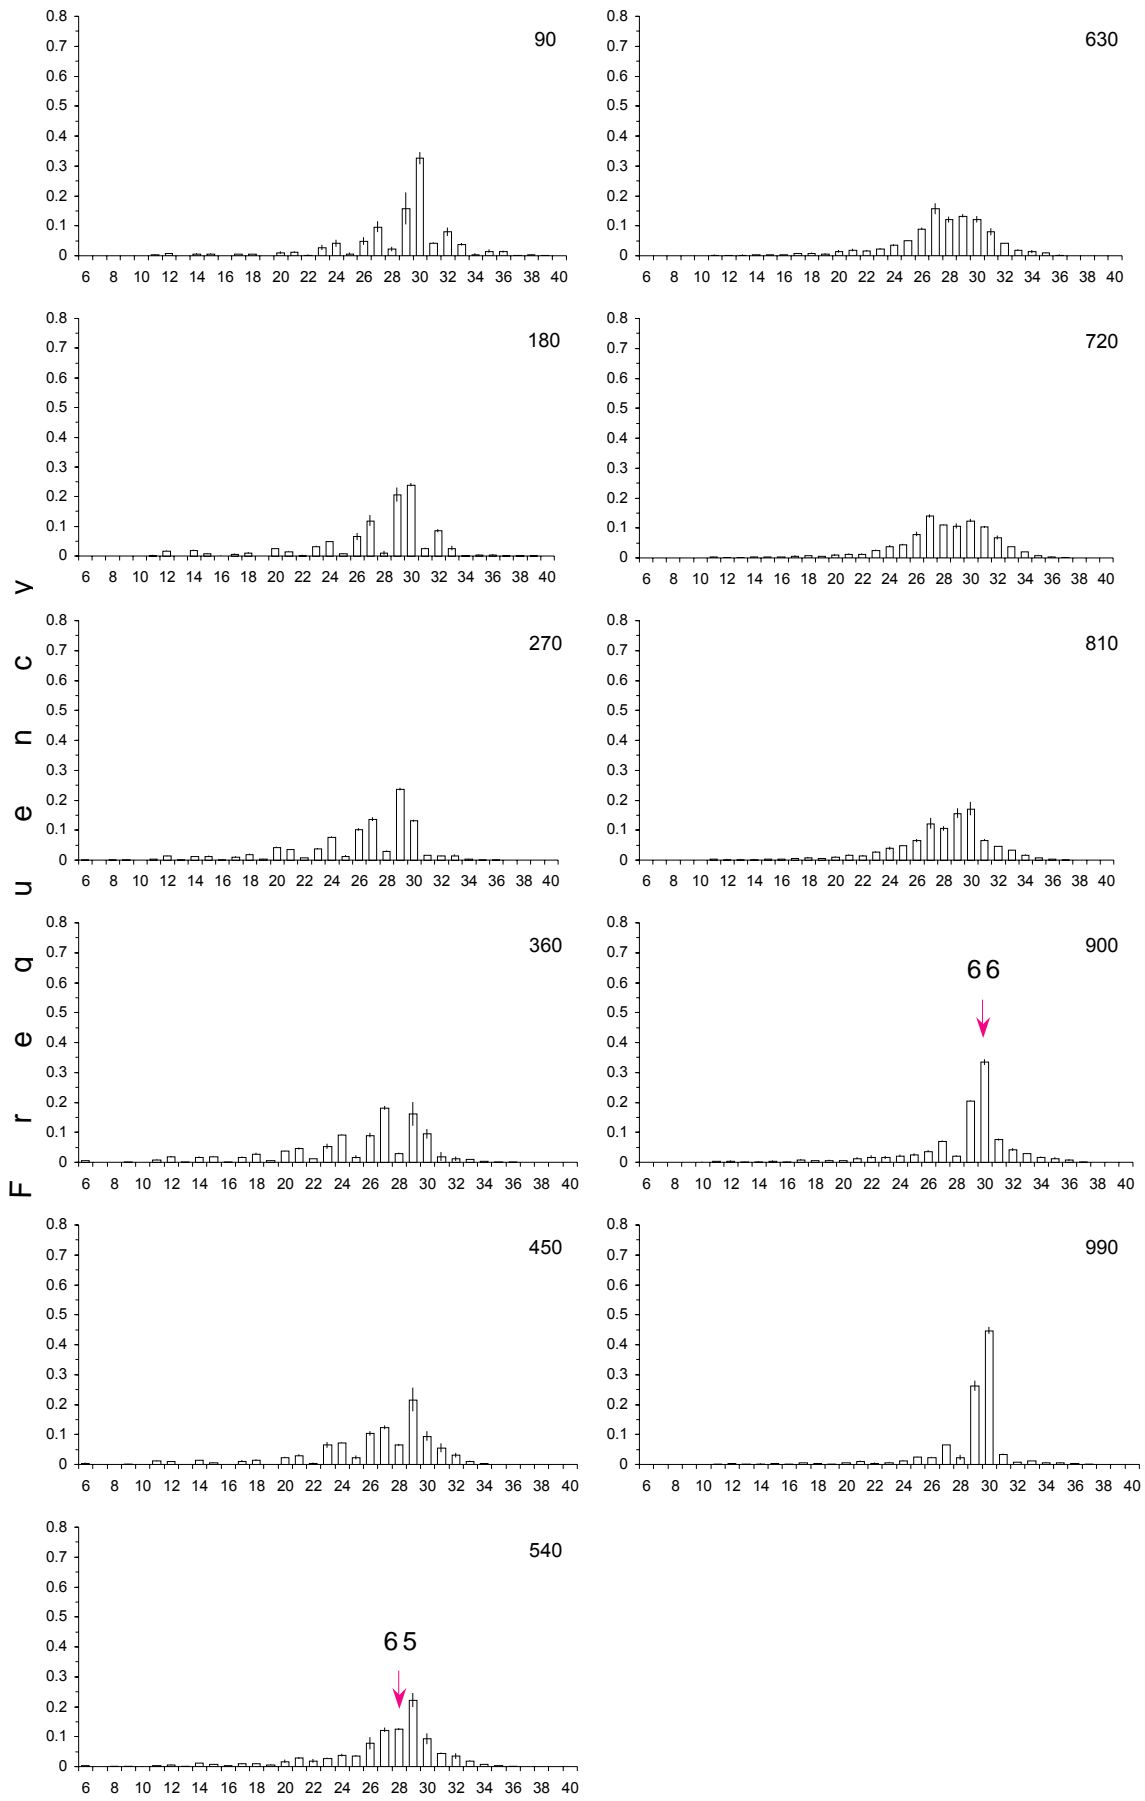

Repeat number  
 Allele frequencies of population number ten

Supplement: pnas_98_3_1113__10.pdf [file pnas_98_3_1113__10.pdf]

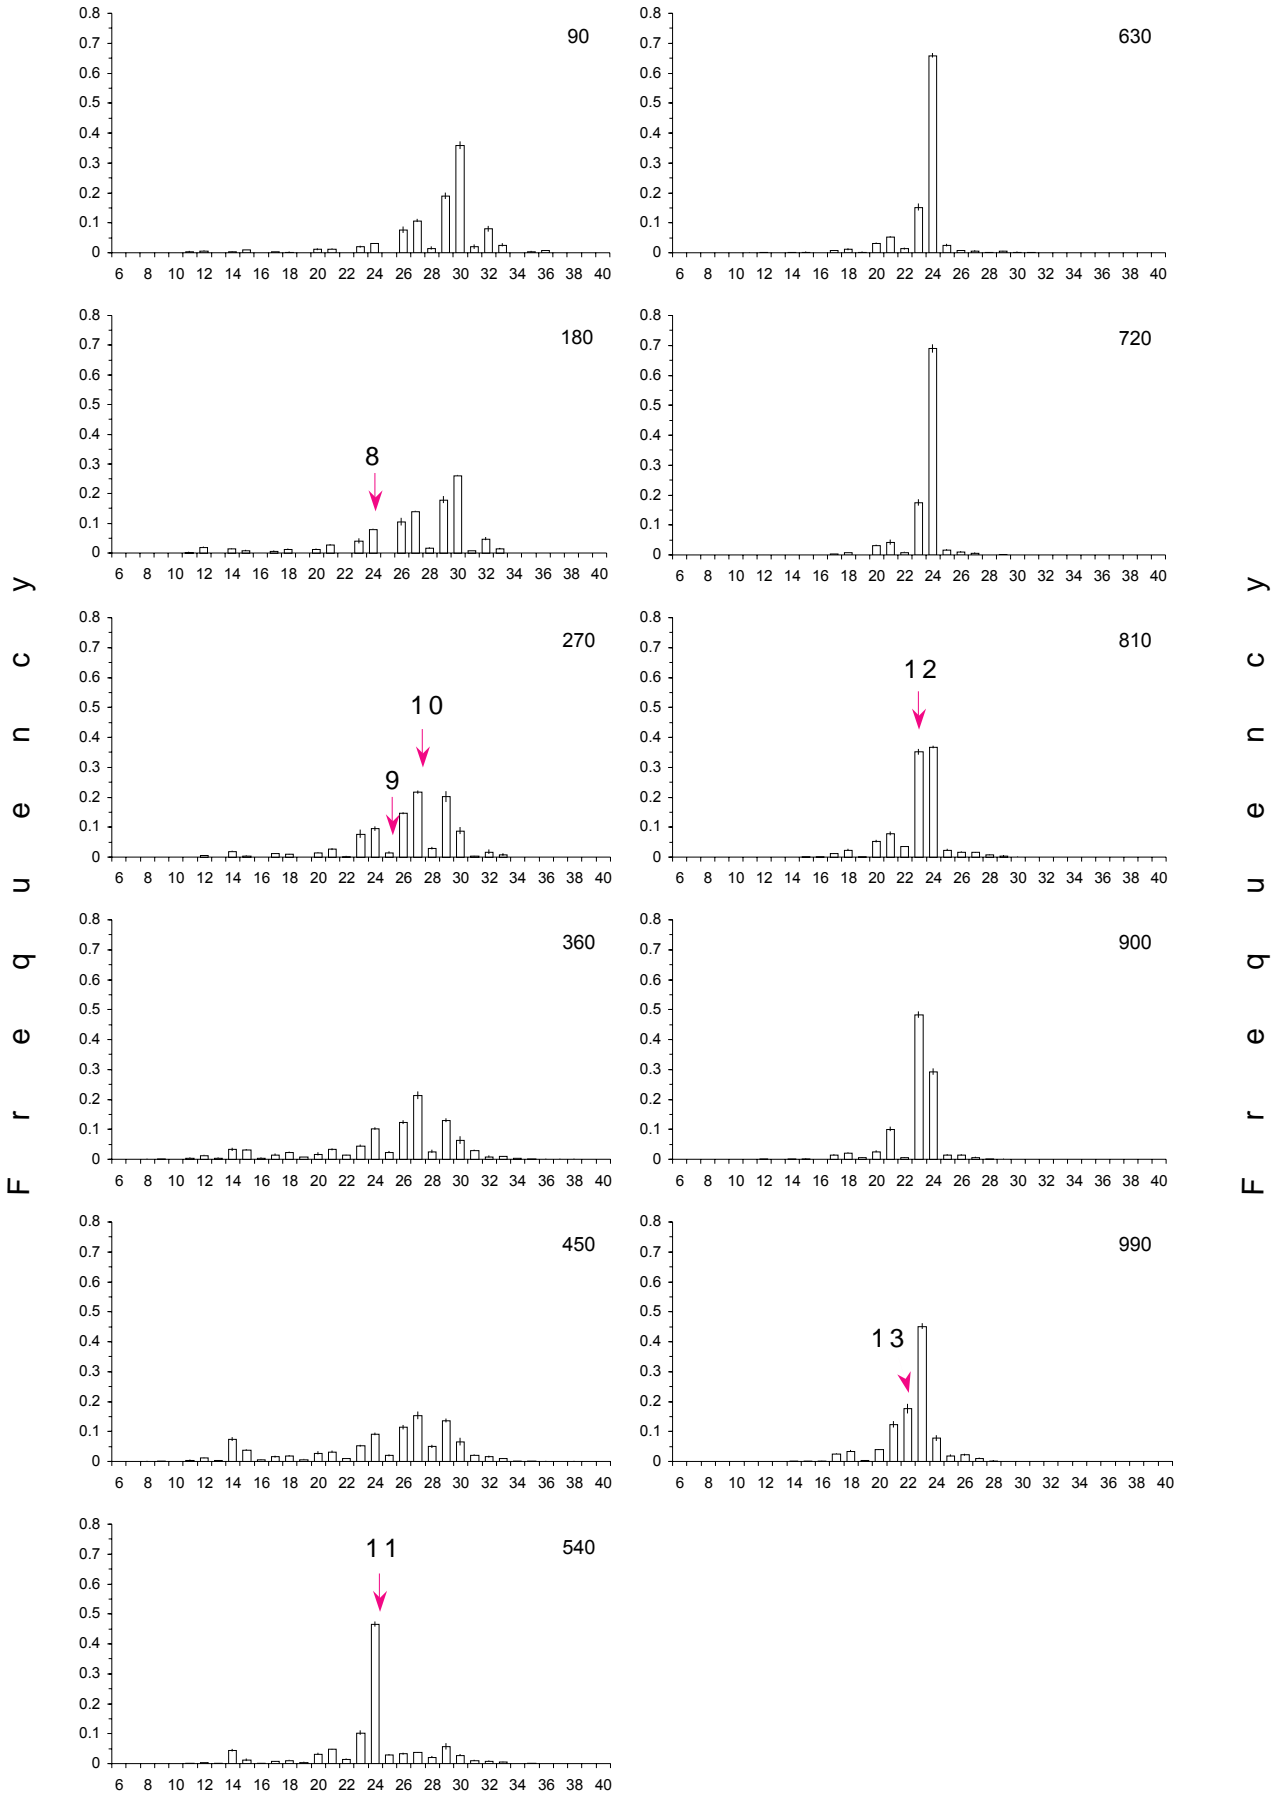

Repeat number  
**Allele frequencies of population number two**

Supplement: pnas_98_3_1113__2.pdf [file pnas_98_3_1113__2.pdf]

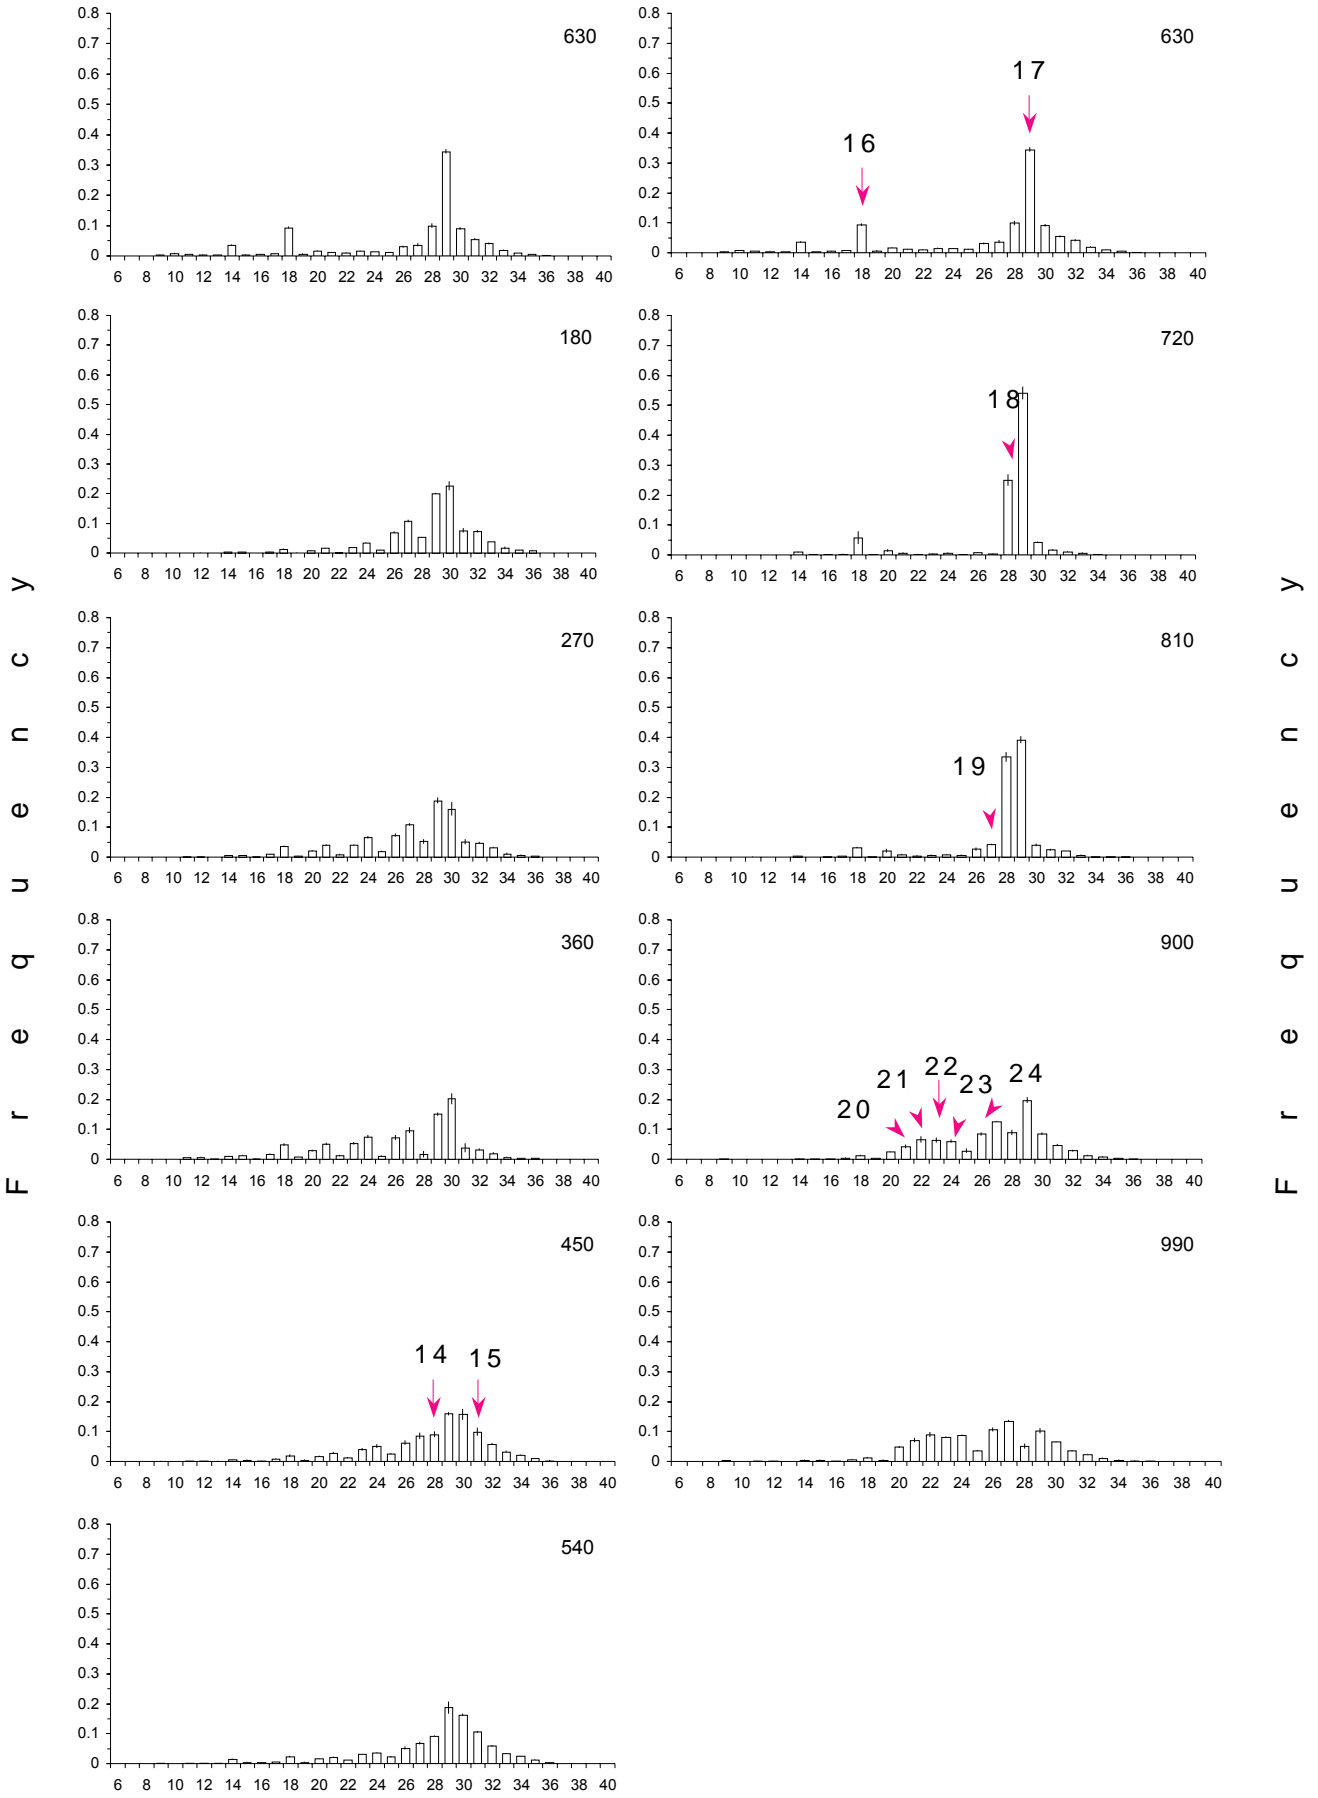

Repeat number  
**Allele frequencies of population number three**

Supplement: pnas_98_3_1113__3.pdf [file pnas_98_3_1113__3.pdf]

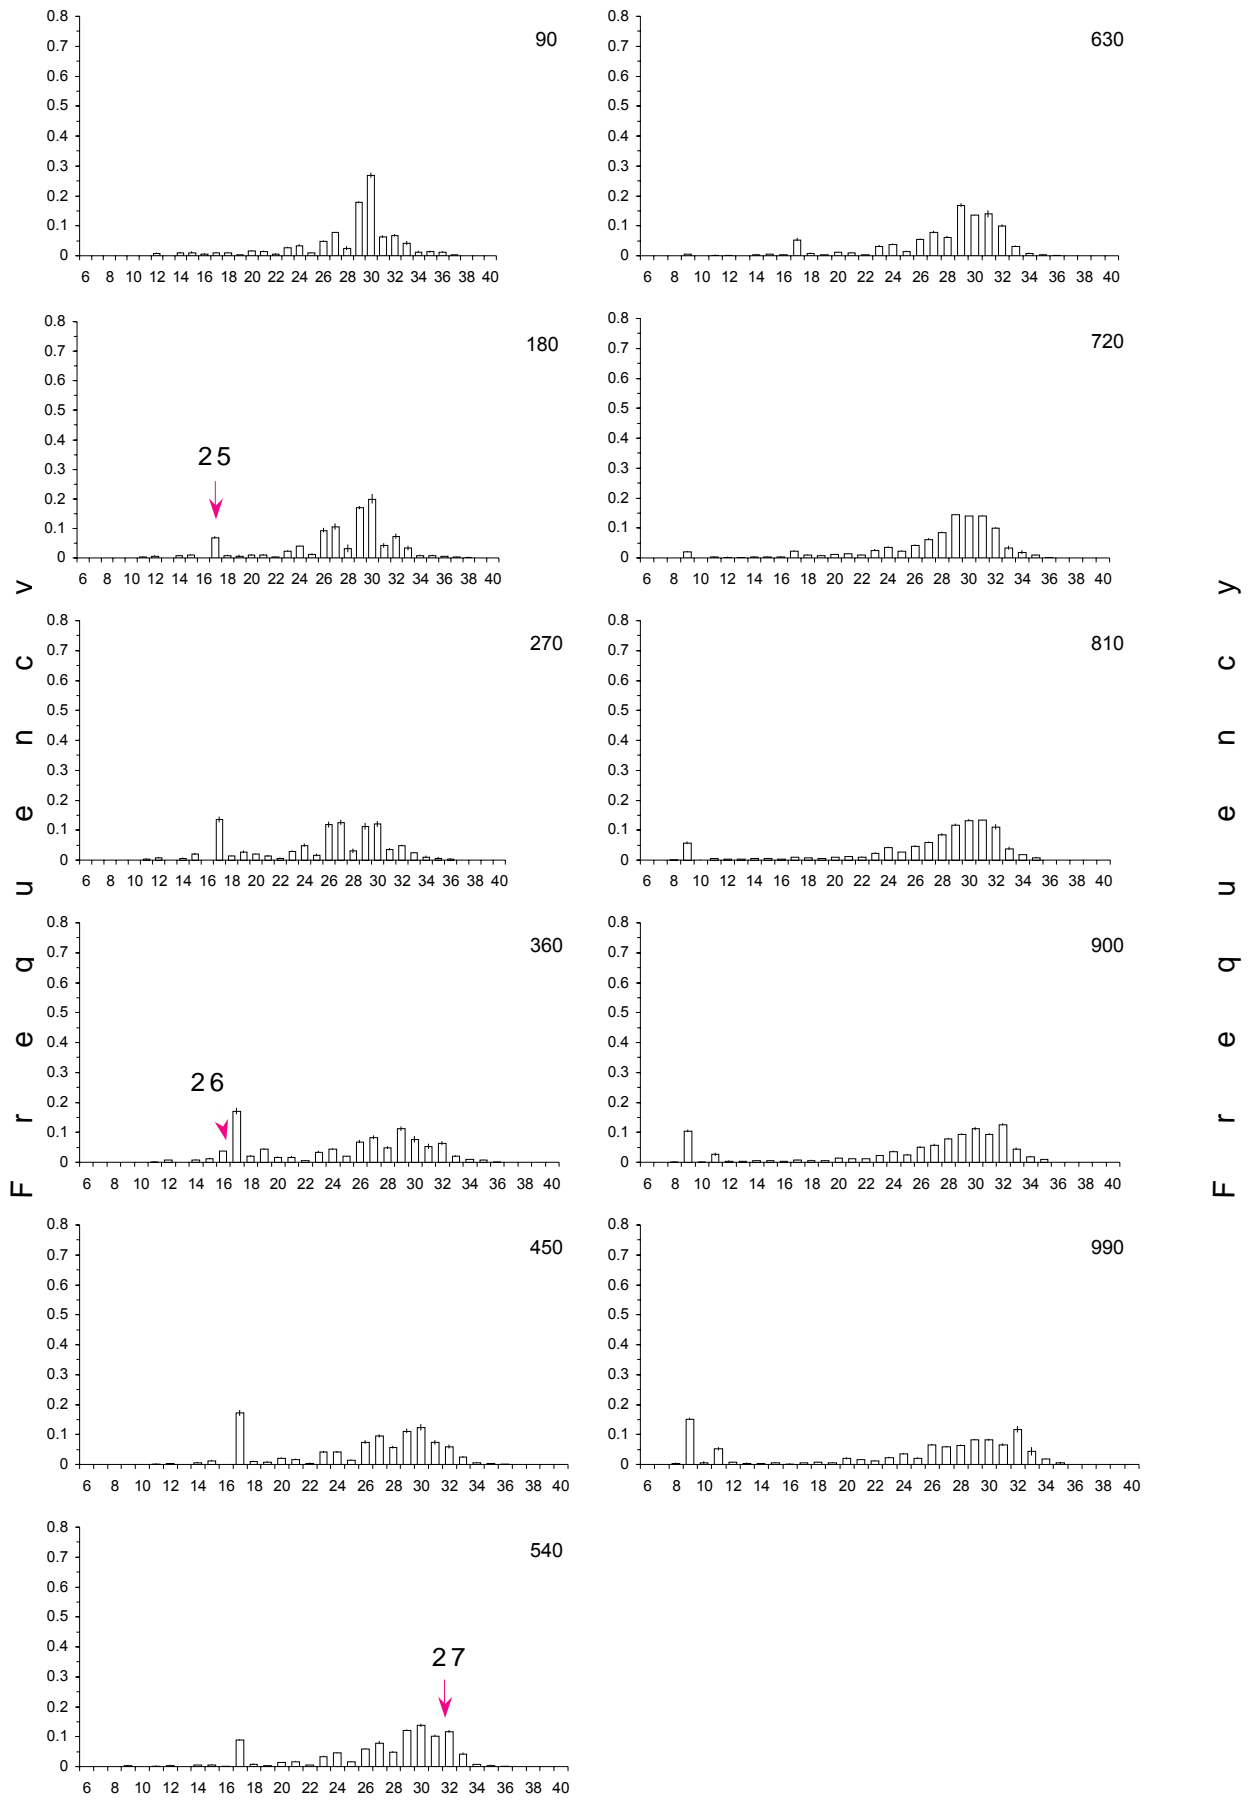

Repeat number  
**Allele frequencies of population number four**

Supplement: pnas_98_3_1113__4.pdf [file pnas_98_3_1113__4.pdf]

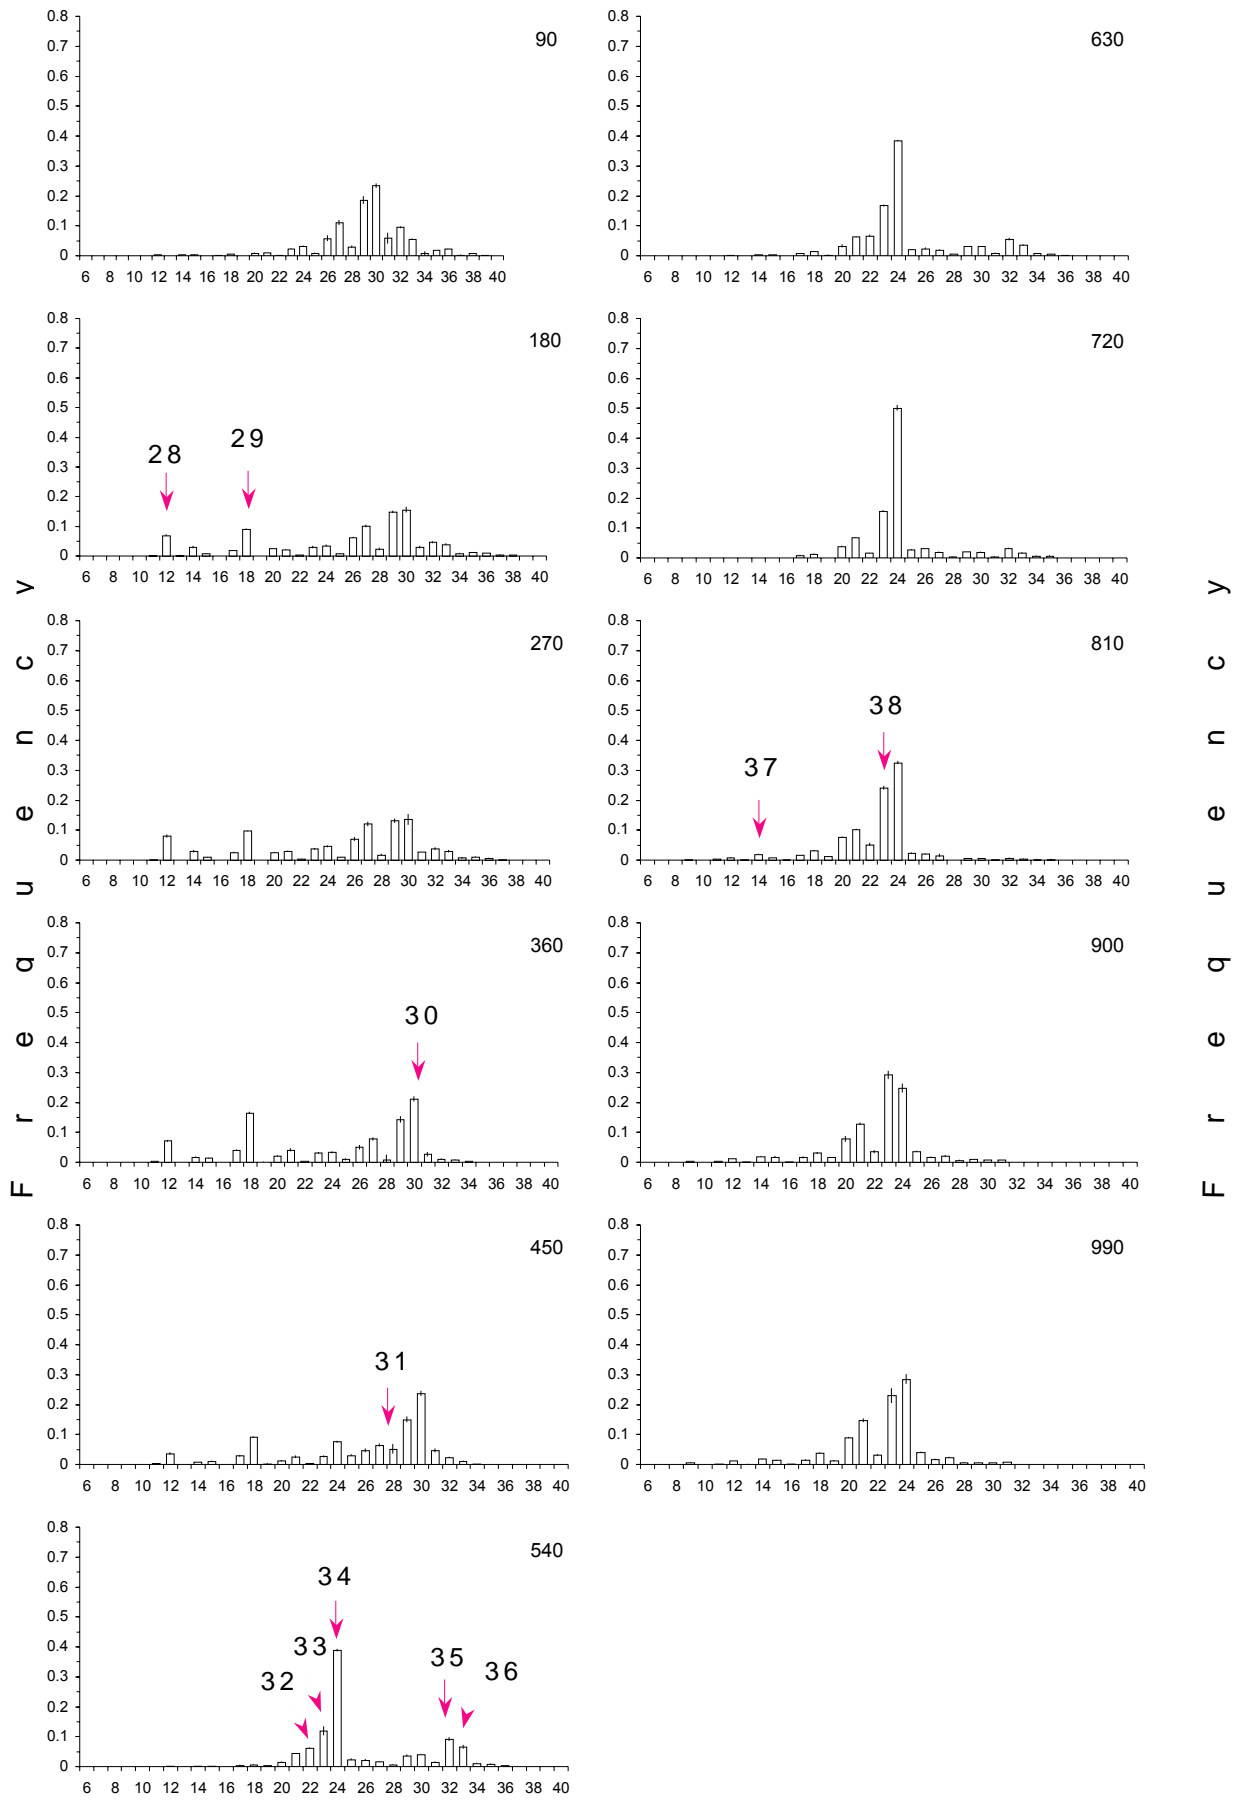

Repeat number  
Allele frequencies of population number five

Supplement: pnas_98_3_1113__5.pdf [file pnas_98_3_1113__5.pdf]

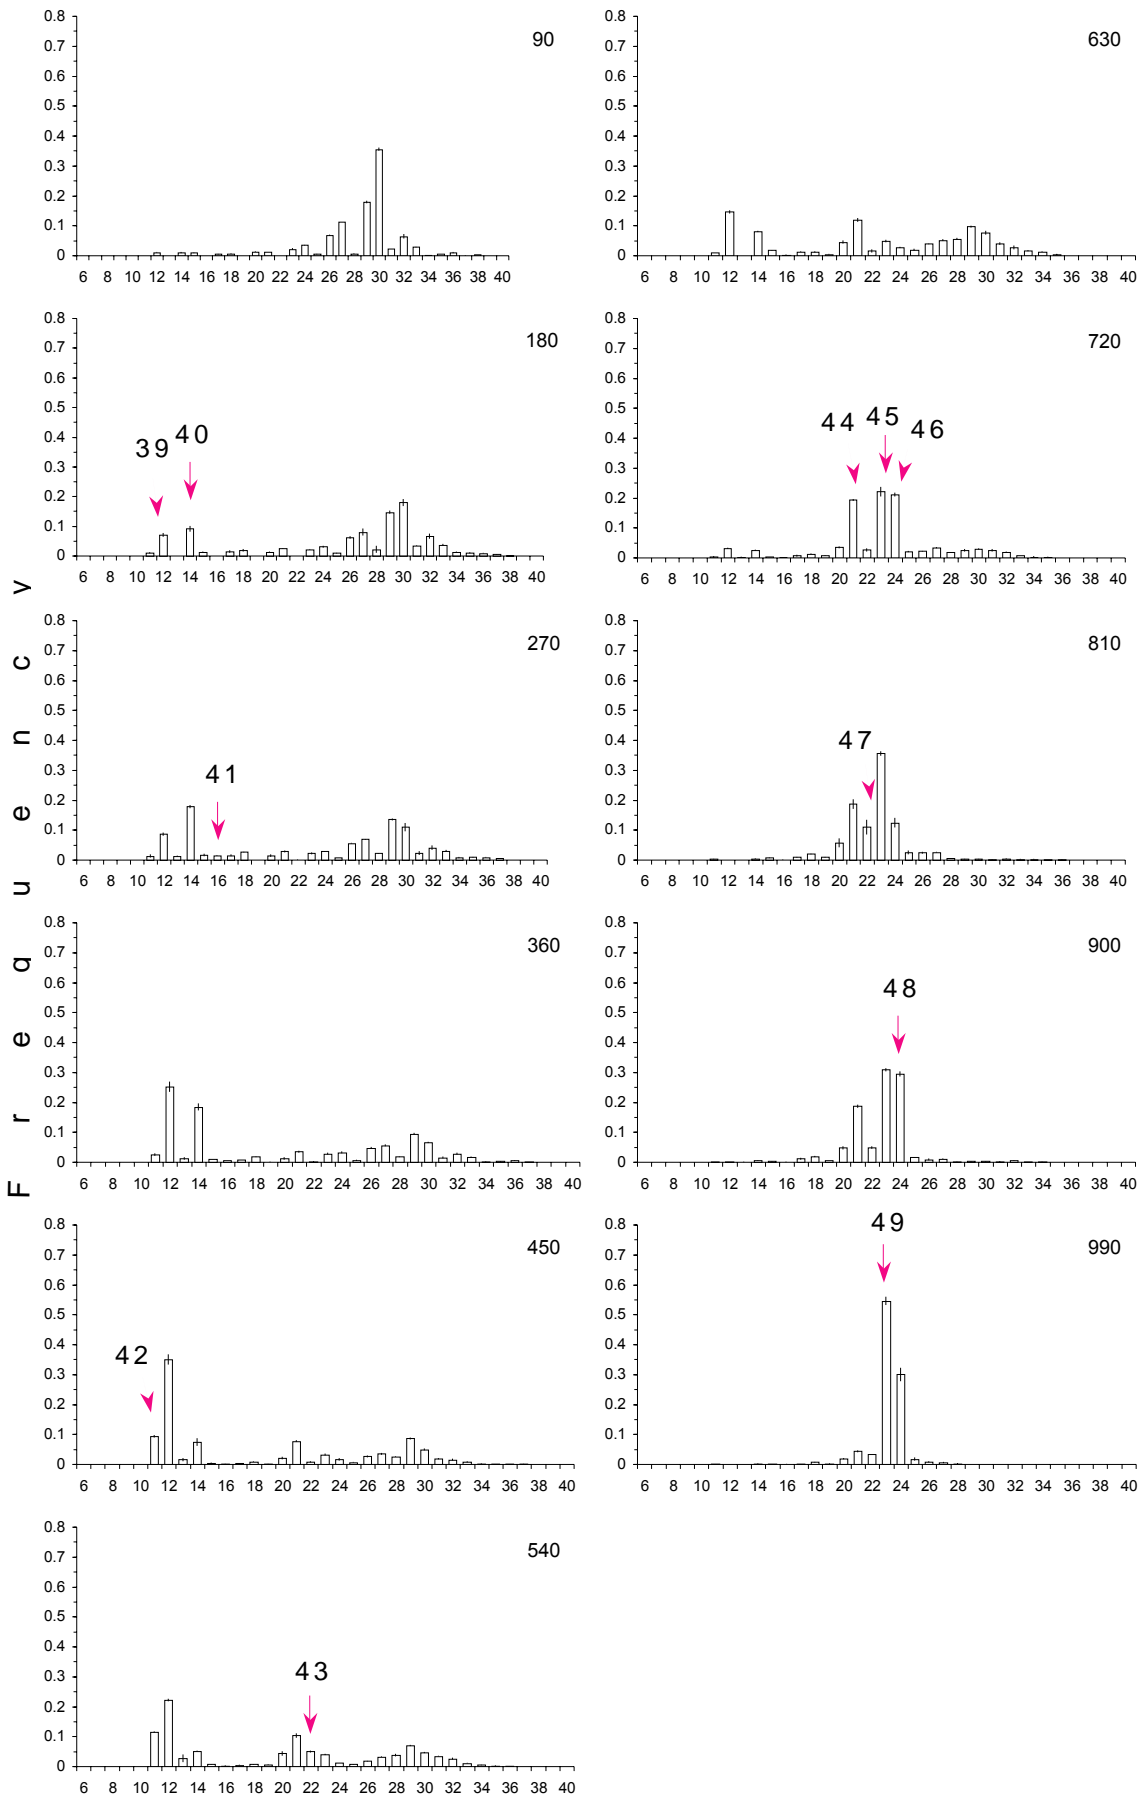

Repeat number  
 Allele frequencies of population number six

Y  
C  
U  
q  
e  
r  
F

Supplement: pnas_98_3_1113__6.pdf [file pnas_98_3_1113__6.pdf]

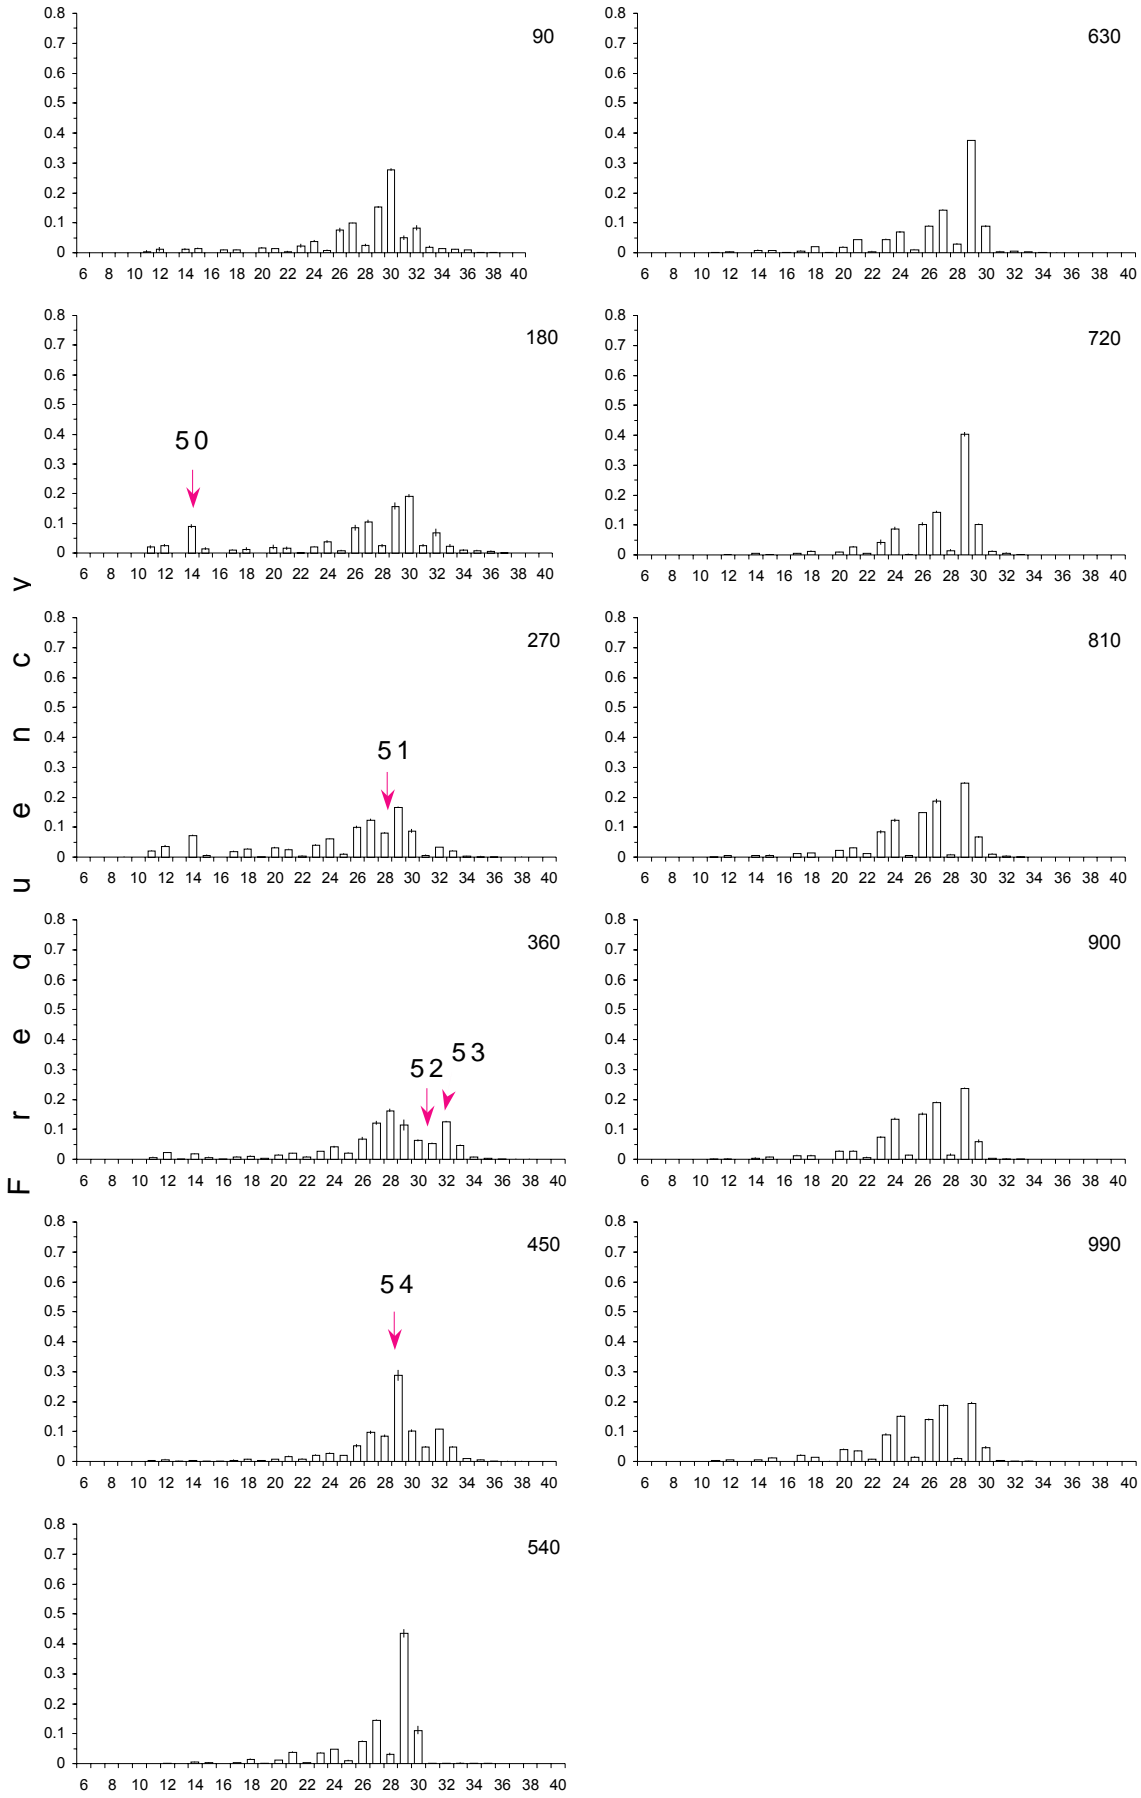

Y  
C  
U  
q  
e  
r  
F

Supplement: pnas_98_3_1113__7.pdf [file pnas_98_3_1113__7.pdf]

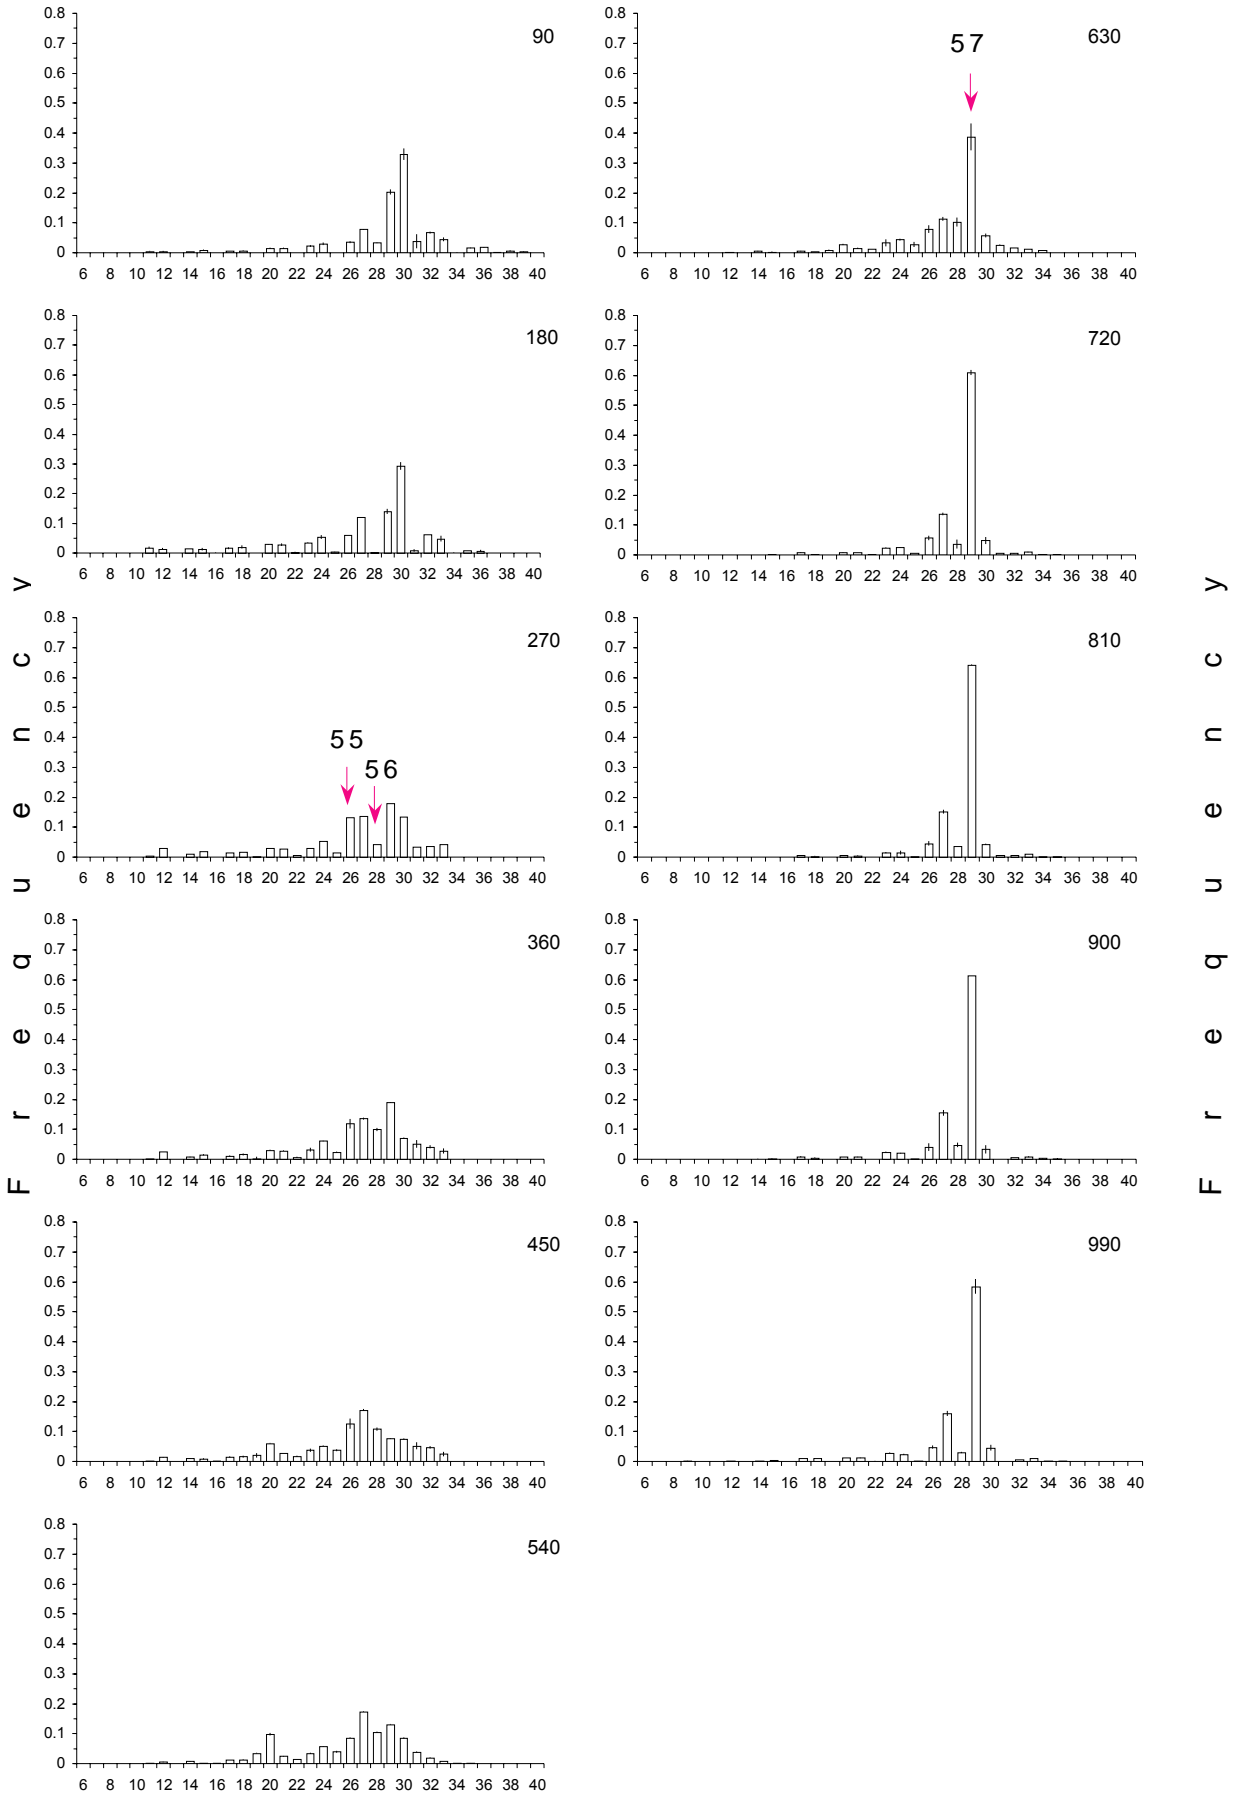

Repeat number  
Allele frequencies of population number eight

Supplement: pnas_98_3_1113__8.pdf [file pnas_98_3_1113__8.pdf]

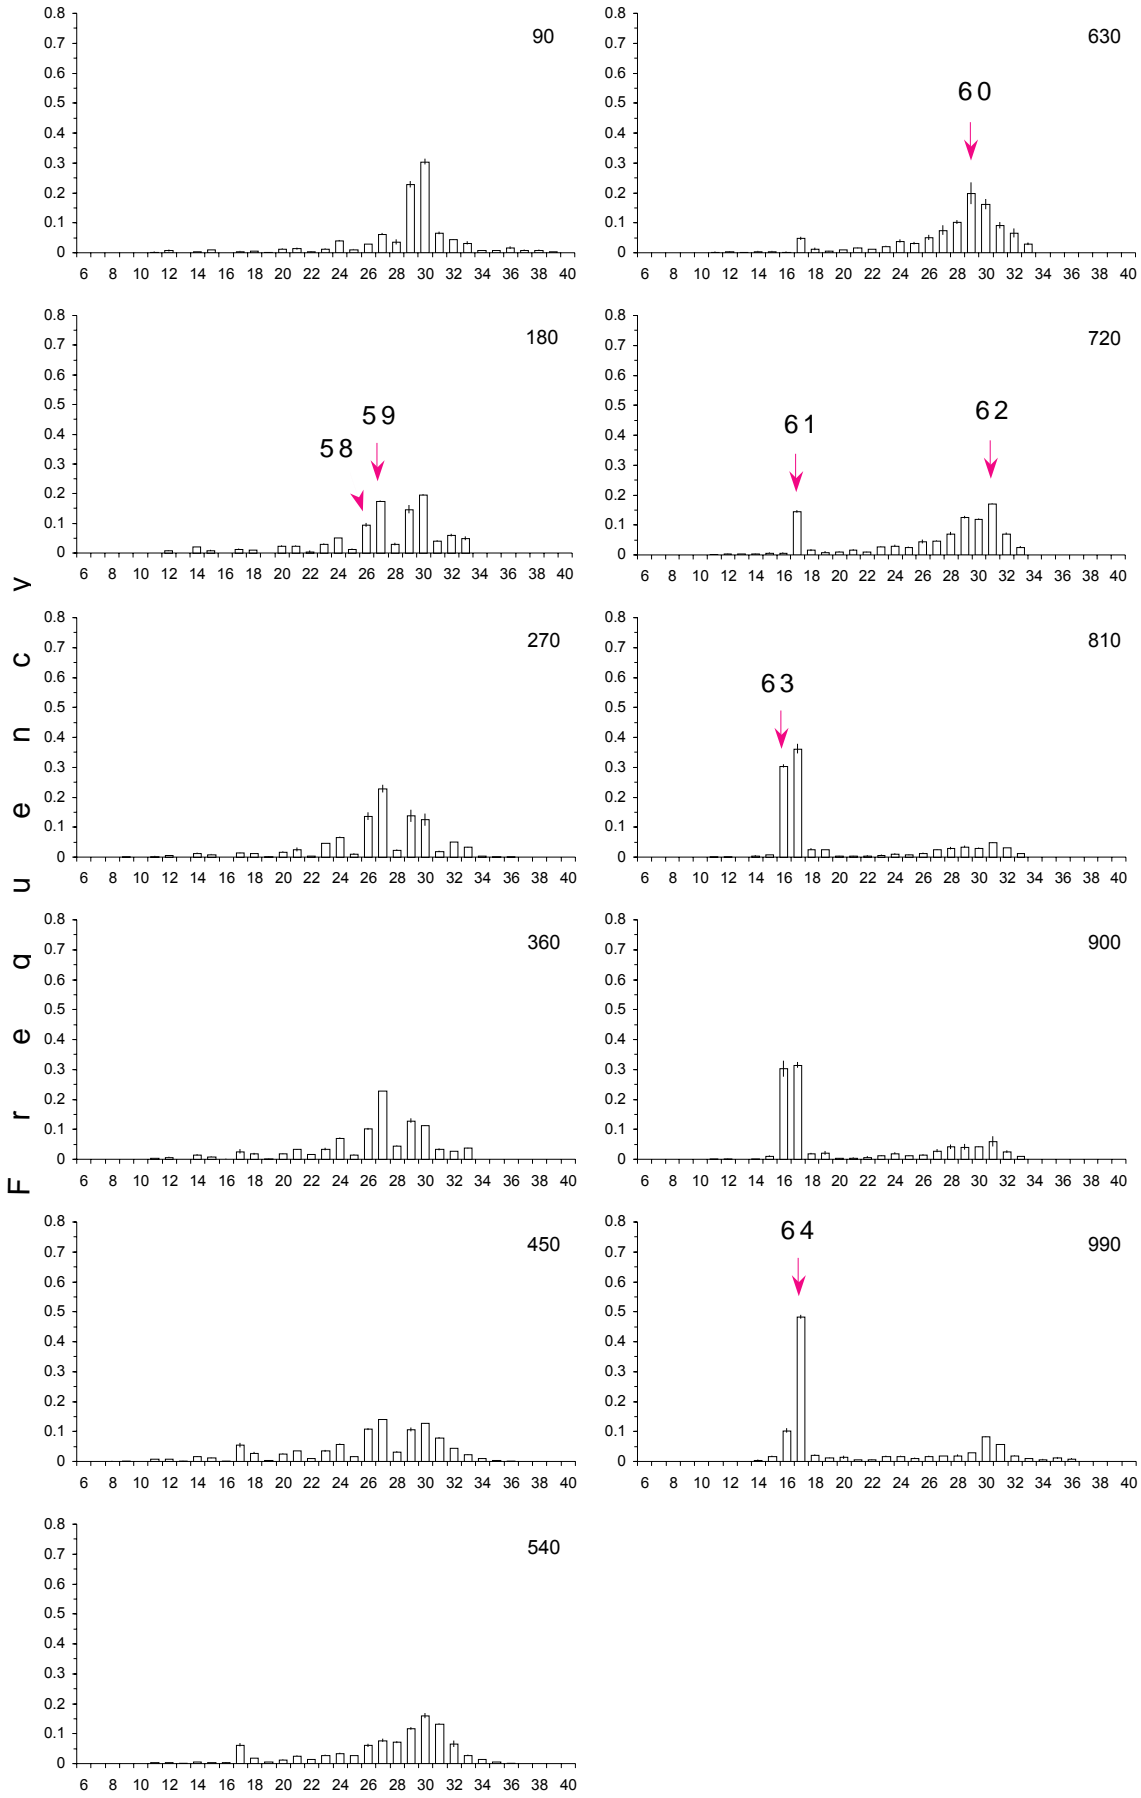

V  
C  
e  
n  
u  
e  
q  
F

y  
c  
e  
u  
q  
F

Repeat number  
Allele frequencies of population number nine

Supplement: pnas_98_3_1113__9.pdf [file pnas_98_3_1113__9.pdf]
